# Supplementary material
Source: Springer Nature journal article supplement (http://www.springermedizin.de/resource/supplementary/12874_2012_763_MOESM2_ESM.pdf/9432878)

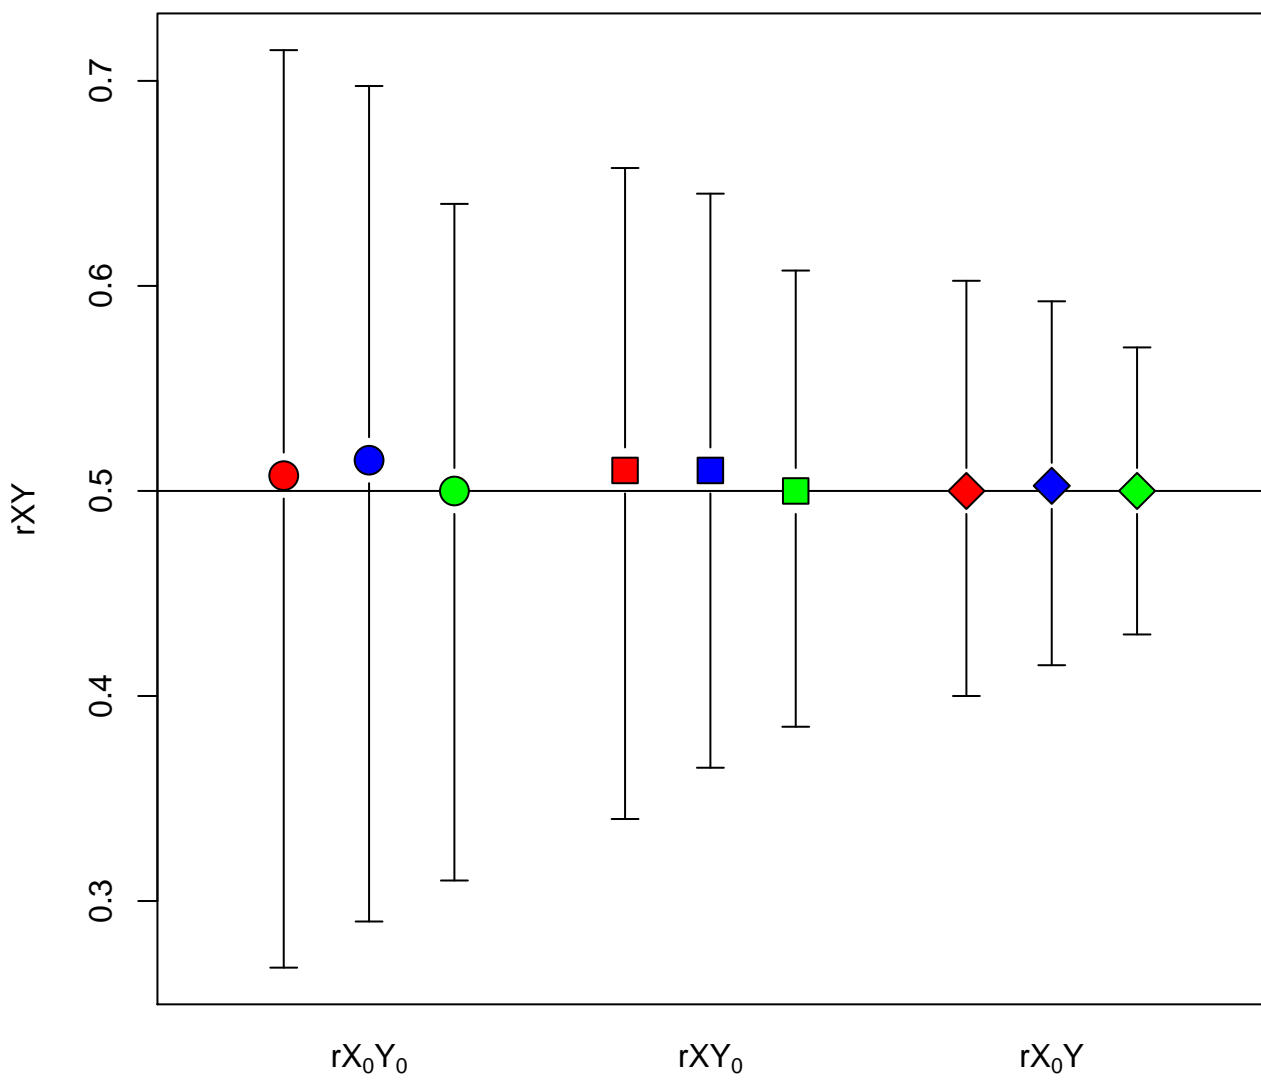

Supplement: MOESM2 [file 9432878]
